# Supplementary material for: Stress-Associated and Growth-Dependent Mutagenesis Are Divergently Regulated by c-di-AMP Levels in Bacillus subtilis
Source: MDPI journal article supplement (doi:10.3390/ijms24010455), 2022-12-27
Supplement: s1 [file s1]

## SUPPLEMENTARY MATERIAL

### Stress-associated and Growth-Dependent Mutagenesis are Divergently Regulated by c-di-AMP Levels in *Bacillus subtilis*

Karen Abundiz-Yañez<sup>1</sup>, Hilda C. Leyva-Sánchez<sup>2</sup>, Eduardo A. Robleto<sup>2</sup>, Mario Pedraza-Reyes<sup>1\*</sup>.

<sup>1</sup>Department of Biology, Division of Natural and Exact Sciences, University of Guanajuato, Guanajuato, México; <sup>2</sup>School of Life Sciences, University of Nevada, Las Vegas, Nevada, USA.

\*Address correspondence to Mario Pedraza-Reyes, [pedrama@ugto.mx](mailto:pedrama@ugto.mx)

## SUPPLEMENTAL FIGURE S1.

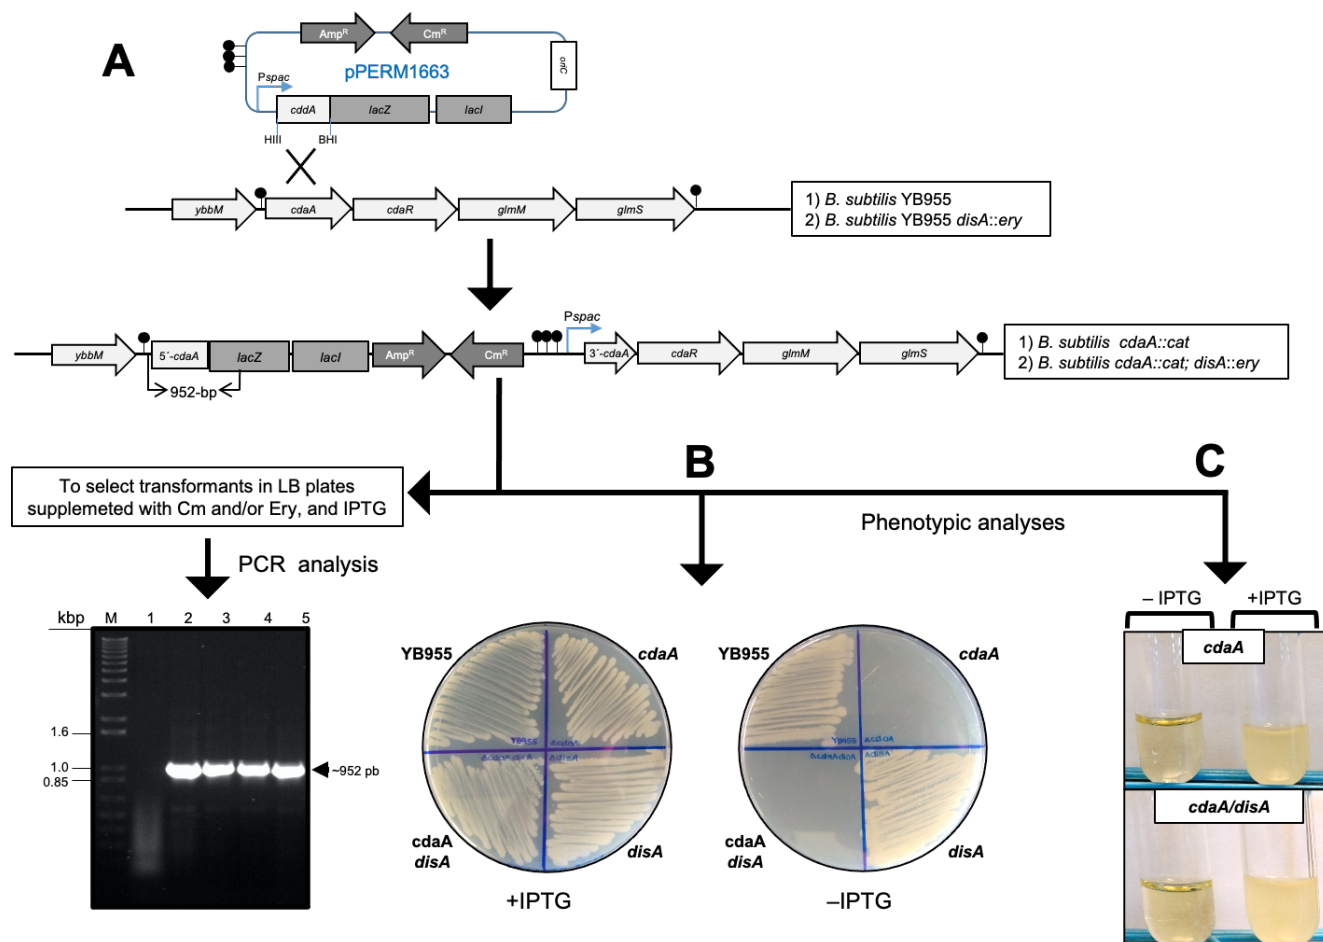

**Figure S1.** Construction and characterization of *B. subtilis* strains carrying *cdaA* or *cdaA/disA* disruptions. **A**). The integrative plasmid pPERM1663 (see Materials and Methods) was used to transform competent cells of *B. subtilis* strains YB955 (Parental) and the isogenic derivative strain PERM1647 (*disA::ery*), respectively. The Campbell-type recombination event leading to inactivation of *cdaA* in these genetic backgrounds was confirmed by amplification of a 952-bp PCR product employing specific oligonucleotide primers as indicated in Materials and Methods. The PCR products from 2 transformant colonies of the *cdaA::cat* (Lanes 2, 3) and *cdaA::cat/disA::ery* (Lanes 4, 5) strains were separated in an agarose gel that was stained with ethidium bromide and shown at the bottom left. Lane 1 corresponds to a PCR reaction performed with chromosomal DNA of the parental strain YB955. **B,C**). Strains deficient for *cdaA* and/or *disA*, as well as the parental strain YB955, were streaked in LB agar plates and incubated for 24 h at 37°C (**B**), or propagated in liquid LB medium for 16 h at 37°C with aeration (250 rpm) (**C**). In both types of cultures, media was supplemented or not with IPTG (0.25 mM), as indicated.
